# Supplementary material for: Evolution of factors shaping the endoplasmic reticulum
Source: PubMed Central journal article supplement (PMC9804665; doi:10.1111/tra.12863), 2022-08-17

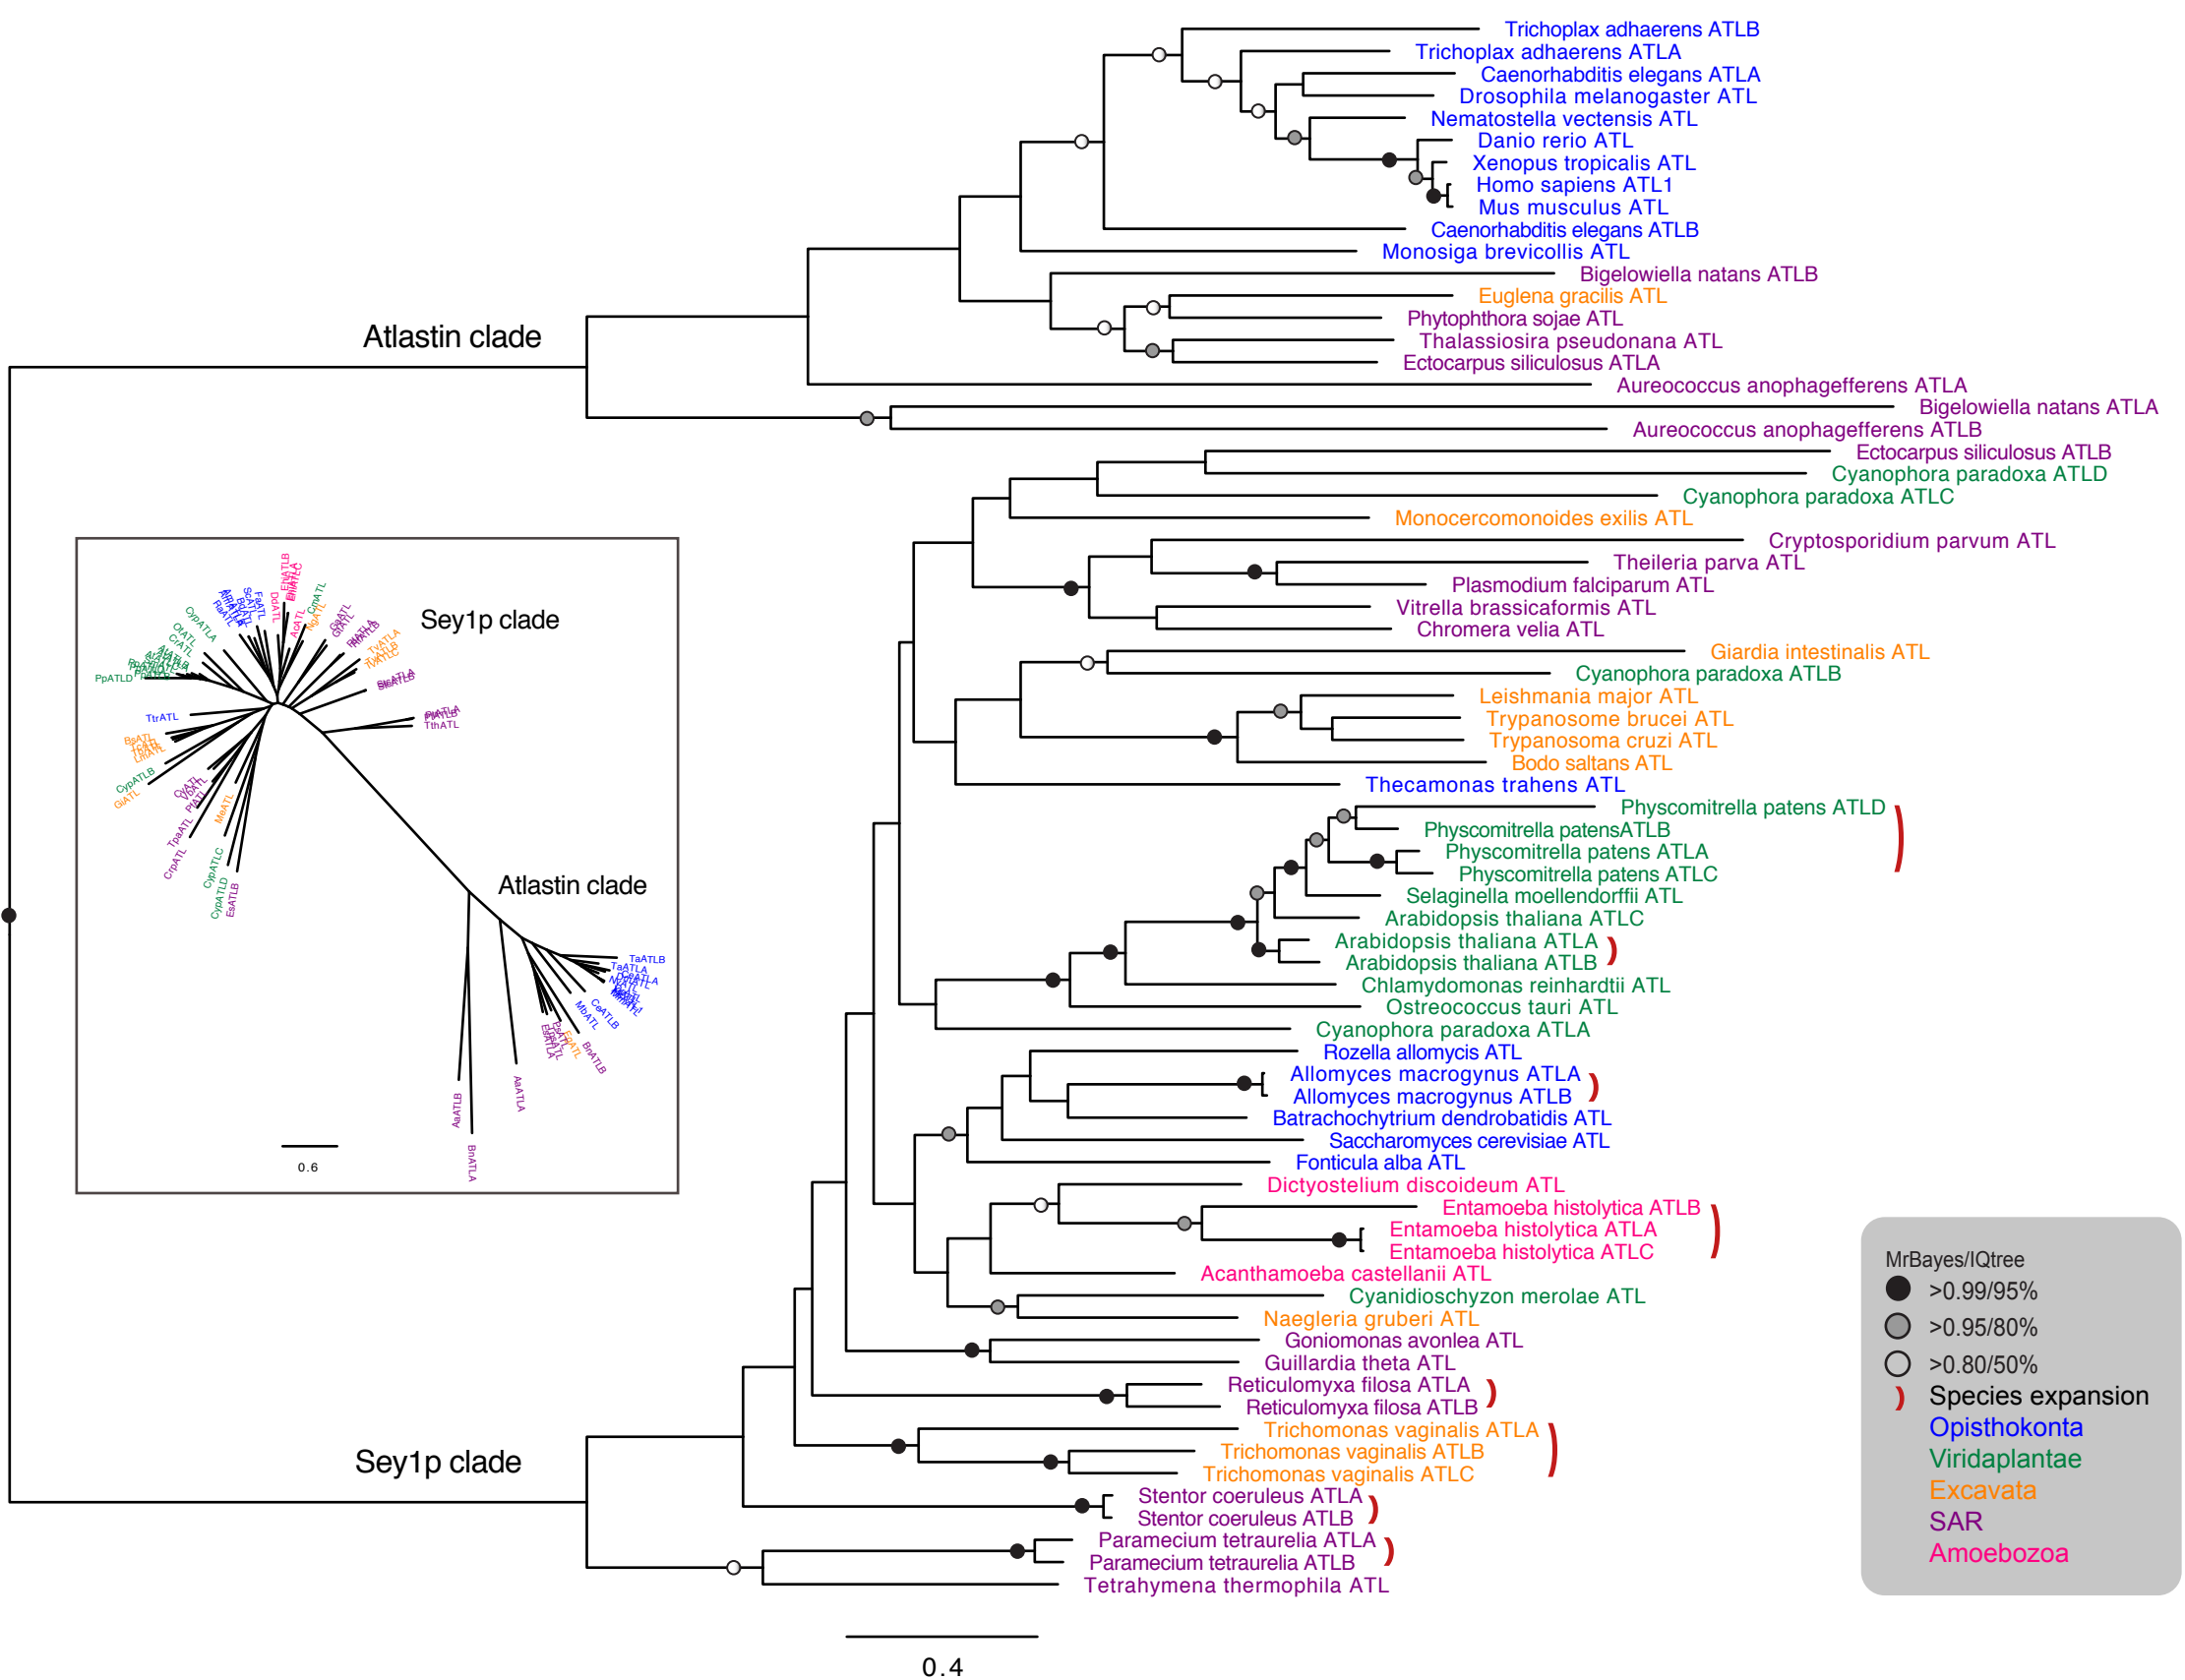

Supplement: TRA-23-462-s002.pdf [file TRA-23-462-s002.pdf]
