# Supplementary material for: Evolution of factors shaping the endoplasmic reticulum
Source: PubMed Central journal article supplement (PMC9804665; doi:10.1111/tra.12863), 2022-08-17
Supplement: TRA-23-462-s007.pdf [file TRA-23-462-s007.pdf]

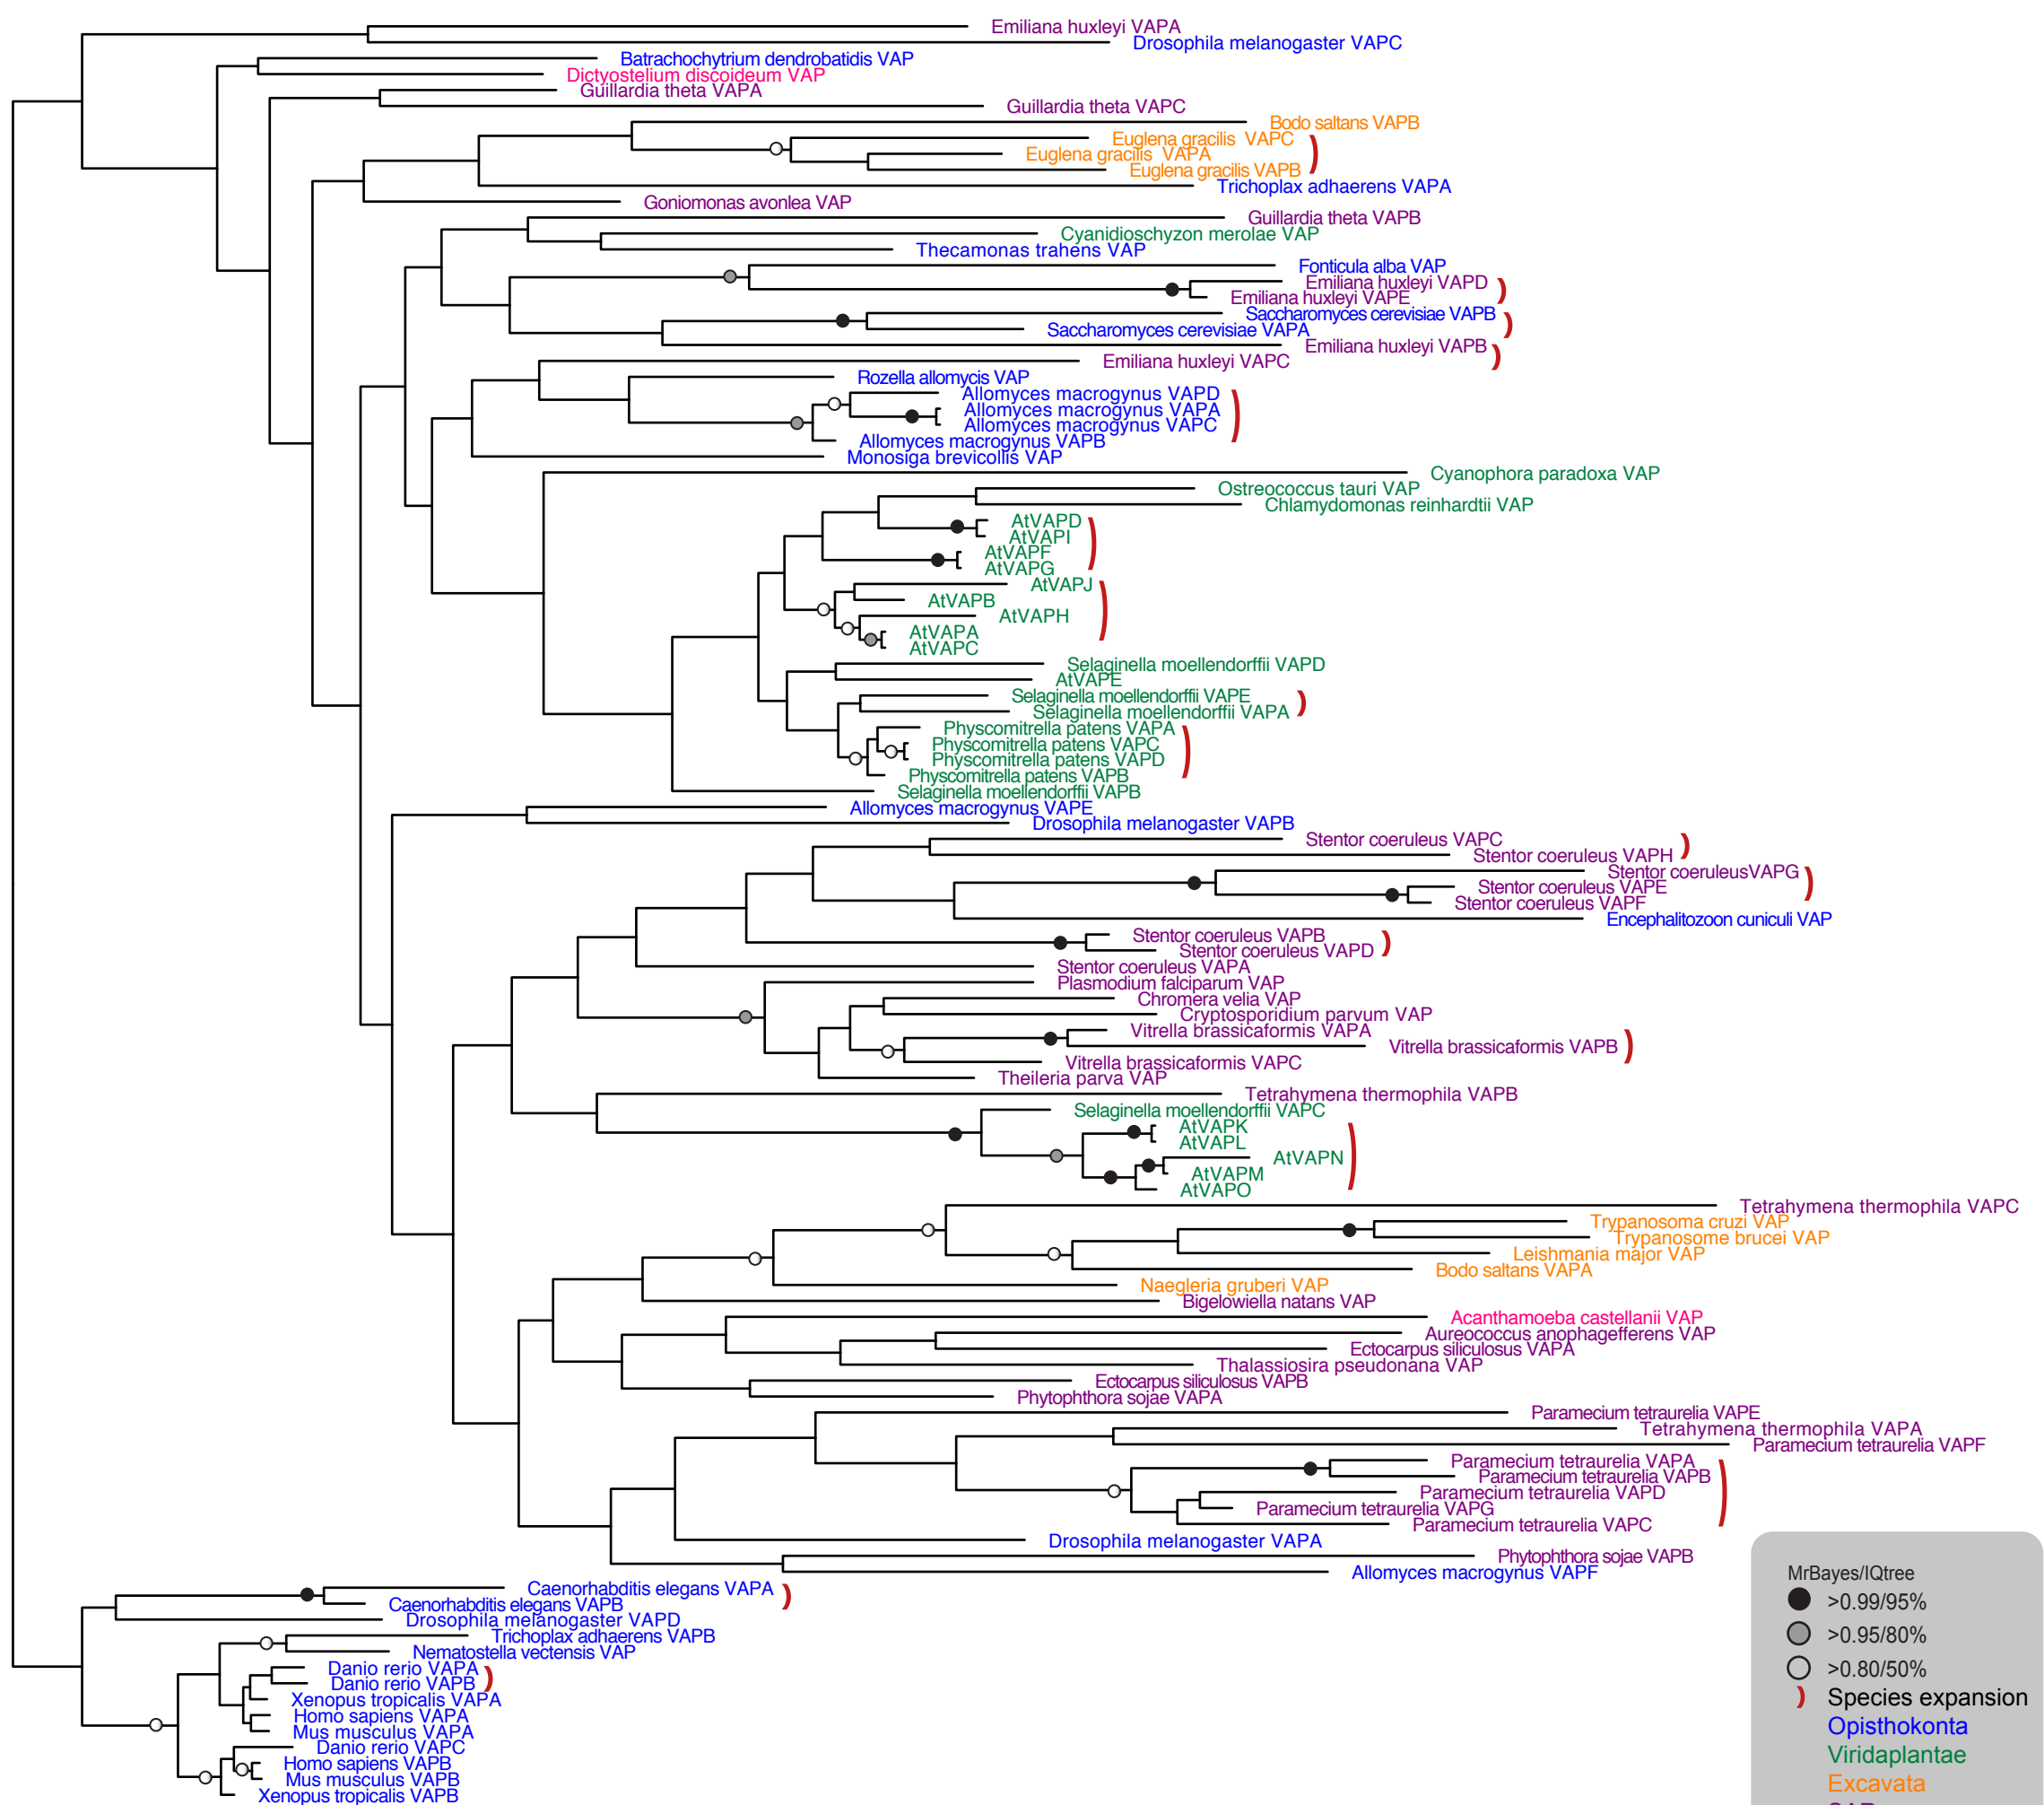

MrBayes/IQtree

- >0.99/95%
- >0.95/80%
- >0.80/50%
- ) Species expansion
- Opisthokonta
- Viridiplantae
- Excavata
- SAR
- Amoebozoa

0.4
